# Supplementary material
Source: PubMed Central journal article supplement (PMC4808265)
Supplement: Supp_Figure1.pdf [file Supp_Figure1.pdf]

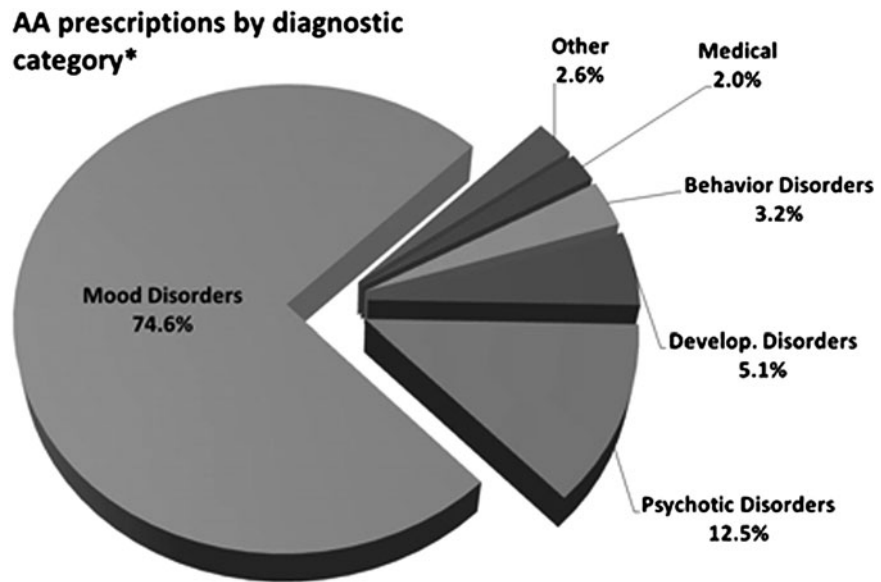

***\*Not included are the 72% of all prescriptions without a diagnosis***

**SUPPLEMENTARY FIG. S1.** Diagnoses listed for the use of atypical antipsychotics (AA) in children  $\leq 6$  years of age on Medicaid in Kentucky for the period 2001–2010.
