# Supplementary material
Source: PubMed Central journal article supplement (PMC4808265)
Supplement: Supp_Figure2.pdf [file Supp_Figure2.pdf]

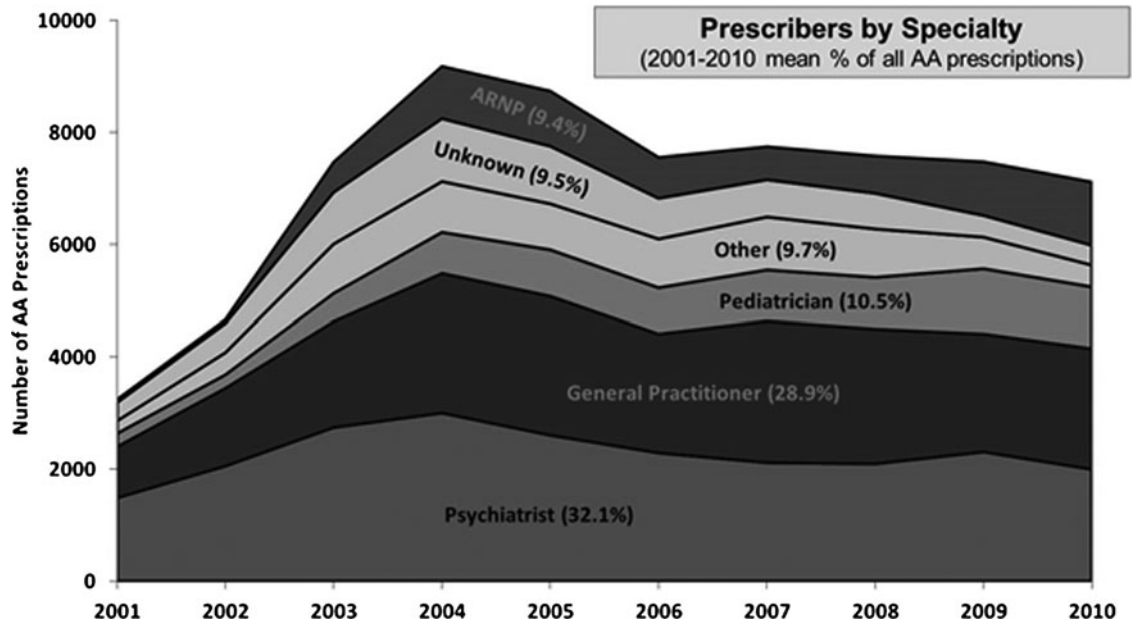

**SUPPLEMENTARY FIG. S2.** Percentages by specialty for providers who prescribed atypical antipsychotics (AA) to children  $\leq 6$  years of age on Medicaid in Kentucky for the period 2001–2010.
